# Supplementary material
Source: Springer Nature journal article supplement (https://www.springermedizin.de/resource/supplementary/13023_2013_595_MOESM4_ESM.pdf/9642856)
Supplement: MOESM4 [file 9642856]

|  | <b>Our patient</b> | <b>Pollitt <i>et al.</i> [1]<br/>Gray <i>et al.</i> [20]<br/>Chambliss <i>et al.</i> [2]</b> | <b>Shield <i>et al.</i> [21]<br/>Sass <i>et al.</i> [3]</b> | <b>Sass <i>et al.</i> [3]</b> |
|--|--------------------|----------------------------------------------------------------------------------------------|-------------------------------------------------------------|-------------------------------|
|--|--------------------|----------------------------------------------------------------------------------------------|-------------------------------------------------------------|-------------------------------|

|                                  |                                                                                                                  |                                                                          |                                                                                                                                                  |                                                                                                                                  |
|----------------------------------|------------------------------------------------------------------------------------------------------------------|--------------------------------------------------------------------------|--------------------------------------------------------------------------------------------------------------------------------------------------|----------------------------------------------------------------------------------------------------------------------------------|
| <b>Patient information</b>       | Female<br>Mixed European ancestry<br>Parents non-consanguineous                                                  | Male<br>Pakistani ancestry<br>Consanguinity not specified                | Female<br>Pakistani ancestry<br>Parents consanguineous                                                                                           | Male<br>Mixed European ancestry<br>Parents consanguineous                                                                        |
| <b>ALDH6A1 mutations</b>         | c.514T>C<br>c.1603C>T                                                                                            | c.1336G>A<br>c.1336G>A                                                   | c.184C>T<br>c.184C>T                                                                                                                             | c.785C>A<br>c.785C>A                                                                                                             |
| <b>Biochemical abnormalities</b> | ↑ plasma/urine MMA<br>↑ lactate<br>↑ HIBA<br>↑ AIBA<br>↑ β-alanine                                               | ↑ methionine<br>↑ 3-hydroxypropionate<br>↑ HIBA<br>↑ AIBA<br>↑ β-alanine | ↑ 3-hydroxypropionate<br>↑ methylcitrate<br>Mild ↑ lactate<br>↑ HIBA<br>↑ AIBA                                                                   | Mild ↑ 3-hydroxypropionate<br>↑ HIBA<br>↑ β-alanine                                                                              |
| <b>CNS findings</b>              | Severe developmental delays, dystonia and microcephaly. Delayed myelination and thin corpus callosum on MRI      | Normal development<br>No imaging reported                                | Severe developmental delays, hypotonia and microcephaly. Delayed myelination and thin corpus callosum on MRI                                     | Early delays, corrected by 25 months. Relative microcephaly. No imaging reported. Frontal cortex microcalcifications on autopsy. |
| <b>Clinical findings</b>         | Tall forehead, epicanthal folds, mild hypertelorism, short philtrum, broad halluces, right single palmar crease. | Healthy<br>No reported dysmorphisms                                      | Microphthalmia and cataracts, diagnosed as Warburg Micro Syndrome. Narrow, down-slanting palpebral fissures, short nose, depressed nasal bridge. | Bulbous nose, long philtrum. Died at 26 months from hepatoencephalopathy and liver failure following a febrile illness.          |
